# Supplementary material for: γ-Valerolactone as Bio-Based Solvent for Nanofiltration Membrane Preparation
Source: MDPI journal article supplement (doi:10.3390/membranes11060418), 2021-05-31
Supplement: s1 [file s1]

# $\gamma$ -Valerolactone as Bio-Based Solvent for Nanofiltration Membrane Preparation

Muhammad Azam Rasool and Ivo F. J. Vankelecom \*

Membrane Technology Group (MTG), Division cMACS, Faculty of Bioscience Engineering, KU Leuven, Celestijnenlaan 200F, P.O. Box 2454, 3001 Leuven, Belgium; ma.rasool@kuleuven.be

\* Correspondence: ivo.vankelecom@kuleuven.be; Tel.: +32-16321594

**Citation:** Rasool, M.A.; Vankelecom, I.F.J.  $\gamma$ -Valerolactone as Bio-Based Solvent for Nanofiltration Membrane Preparation. *Membranes* **2021**, *11*, 418. <https://doi.org/10.3390/membranes11060418>

Academic Editor: Enrico Drioli

Received: 6 May 2021

Accepted: 14 May 2021

Published: 31 May 2021

**Publisher's Note:** MDPI stays neutral with regard to jurisdictional claims in published maps and institutional affiliations.

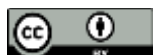

**Copyright:** © 2021 by the authors. Licensee MDPI, Basel, Switzerland. This article is an open access article distributed under the terms and conditions of the Creative Commons Attribution (CC BY) license (<http://creativecommons.org/licenses/by/4.0/>).

## Hansen solubility parameters

Hansen divided the heat of vaporization energy into 3 different parts and processed as dimensional vectors which are  $\delta_D$ ,  $\delta_P$ , and  $\delta_H$  and are attributed to polar forces, dispersive forces, and hydrogen bonding respectively. Hildebrand parameter is a geometric means of HSP parameters and calculated by equation 1 [1]. From table S4, the total solubility values of polymers and GVL have difference in values but still they formed a homogeneous solution, most probably due to size of GVL.

$$\delta_t = \sqrt{\delta_D^2 + \delta_P^2 + \delta_H^2} \quad (1)$$

These three HSPs are modelled as a sphere with radius  $R$  and centered at  $\delta_D$ ,  $\delta_P$ , and  $\delta_H$  of the polymer is plotted and  $R_0$  is the critical radius of interaction of a polymer.

HSP values for polymers and GVL is given in tables (S1–S5), which were taken from literature. [2–5] Relative energy difference (RED) is equal to  $R_a/R$ , used to explain the solubility of polymers in a given solvent by a single parameter [6–8]. Smaller values of  $R_a$  represent that they can make a homogeneous solution. A single parameter to describe solvent quality and its ability to dissolve a polymer is RED (relative energy difference), which equals  $R_a/R$ .

$$RED = \frac{R_a}{R} \quad (2)$$

While  $R_a$  is interaction distance between polymer and solvent,  $R$  is the sphere of the solubility radius of the polymer. If the RED value is smaller than 1, this indicates a high affinity

between polymer and solvent, polymer should be soluble in the given solvent. When the RED value is higher than 1, indicates a low affinity between solvent and the polymer and the polymer would probably not be soluble in given solvent. Details of the HSP and RED values are given in each table (Table S1-S5). Solubility parameters difference (Ra) of GVL and non-solvent is given in table S6.

**Table S1.** Hansen solubility parameters and relative energy difference (RED) for CA.

| Polymer/Solvent | $\delta_D$                   | $\delta_P$         | $\delta_H$         | $\delta$           | R                        |           |
|-----------------|------------------------------|--------------------|--------------------|--------------------|--------------------------|-----------|
|                 | MPa <sup>1/2</sup>           | MPa <sup>1/2</sup> | MPa <sup>1/2</sup> | MPa <sup>1/2</sup> | MPa <sup>1/2</sup>       |           |
| CA              | 16                           | 7.5                | 13.5               | 22.2               | 8.8                      |           |
|                 | Hansen Solubility Parameters |                    |                    |                    | Ra (MPa <sup>1/2</sup> ) | RED = R/R |
|                 | $\delta_D$                   | $\delta_P$         | $\delta_H$         | $\delta$           |                          |           |
|                 | MPa <sup>1/2</sup>           | MPa <sup>1/2</sup> | MPa <sup>1/2</sup> | MPa <sup>1/2</sup> |                          |           |
| GVL             | 15.5                         | 4.7                | 6.6                | 17.4               | 10.5                     | 1.2       |

**Table S2.** Hansen solubility parameters and relative energy difference (RED) for PI.

| Polymer/Solvent | $\delta_D$                   | $\delta_P$         | $\delta_H$         | $\delta$           | R                        |            |
|-----------------|------------------------------|--------------------|--------------------|--------------------|--------------------------|------------|
|                 | MPa <sup>1/2</sup>           | MPa <sup>1/2</sup> | MPa <sup>1/2</sup> | MPa <sup>1/2</sup> | MPa <sup>1/2</sup>       |            |
| PI(Polyimide)   | 20.9                         | 11.3               | 9.7                | 25.7               | 13.4                     |            |
| Solvent         | Hansen Solubility Parameters |                    |                    |                    | Ra (MPa <sup>1/2</sup> ) | RED = Ra/R |
|                 | $\delta_D$                   | $\delta_P$         | $\delta_H$         | $\delta$           |                          |            |
|                 | MPa <sup>1/2</sup>           | MPa <sup>1/2</sup> | MPa <sup>1/2</sup> | MPa <sup>1/2</sup> |                          |            |
| GVL             | 15.5                         | 4.7                | 6.6                | 17.4               | 13.1                     | 0.9        |

**Table S3.** Hansen solubility parameters and relative energy difference (RED) for PSU.

| Polymer/Solvent | $\delta_D$                   | $\delta_P$         | $\delta_H$         | $\delta$           | R                        |            |
|-----------------|------------------------------|--------------------|--------------------|--------------------|--------------------------|------------|
|                 | MPa <sup>1/2</sup>           | MPa <sup>1/2</sup> | MPa <sup>1/2</sup> | MPa <sup>1/2</sup> | MPa <sup>1/2</sup>       |            |
| PSU             | 19.7                         | 8.3                | 8.3                | 22.9               | 8                        |            |
| Solvent         | Hansen Solubility Parameters |                    |                    |                    | Ra (MPa <sup>1/2</sup> ) | RED = Ra/R |
|                 | $\delta_D$                   | $\delta_P$         | $\delta_H$         | $\delta$           |                          |            |
|                 | MPa <sup>1/2</sup>           | MPa <sup>1/2</sup> | MPa <sup>1/2</sup> | MPa <sup>1/2</sup> |                          |            |
| GVL             | 15.5                         | 4.68               | 6.56               | 17.4               | 9.4                      | 1.1        |

**Table S4.** Hansen solubility parameters for PES and relative energy difference (RED) for PES.

| Polymer/Solvent | $\delta_D$                   | $\delta_P$         | $\delta_H$         | $\delta$           | R                        |            |
|-----------------|------------------------------|--------------------|--------------------|--------------------|--------------------------|------------|
|                 | MPa <sup>1/2</sup>           | MPa <sup>1/2</sup> | MPa <sup>1/2</sup> | MPa <sup>1/2</sup> | MPa <sup>1/2</sup>       |            |
| PES             | 19.6                         | 10.8               | 9.2                | 24.2               | 6.2                      |            |
| Solvent         | Hansen Solubility Parameters |                    |                    |                    | Ra (MPa <sup>1/2</sup> ) | RED = Ra/R |
|                 | $\delta_D$                   | $\delta_P$         | $\delta_H$         | $\delta$           |                          |            |

|     | MPa <sup>1/2</sup> | MPa <sup>1/2</sup> | MPa <sup>1/2</sup> | MPa <sup>1/2</sup> |      |     |
|-----|--------------------|--------------------|--------------------|--------------------|------|-----|
| GVL | 15.5               | 4.7                | 6.6                | 17.4               | 10.6 | 1.7 |

**Table S5.** Hildebrand/Hansen solubility parameters of GVL and interaction distance for CTA.

| Polymer/Solvent | $\delta_D$                   | $\delta_P$         | $\delta_H$         | $\delta$           |                          |
|-----------------|------------------------------|--------------------|--------------------|--------------------|--------------------------|
|                 | MPa <sup>1/2</sup>           | MPa <sup>1/2</sup> | MPa <sup>1/2</sup> | MPa <sup>1/2</sup> |                          |
| CTA             | 18.0                         | 12.0               | 10.0               | 23.8               |                          |
| Solvent         | Hansen Solubility Parameters |                    |                    |                    | Ra (MPa <sup>1/2</sup> ) |
|                 | $\delta_D$                   | $\delta_P$         | $\delta_H$         | $\delta$           |                          |
|                 | MPa <sup>1/2</sup>           | MPa <sup>1/2</sup> | MPa <sup>1/2</sup> | MPa <sup>1/2</sup> |                          |
| GVL             | 15.5                         | 4.7                | 6.6                | 17.4               | 9.5                      |

**Table S6.** Solubility parameters difference (Ra) of GVL and non-solvent.

| Solvent/Non-Solvent    | $\delta_D$                   | $\delta_P$         | $\delta_H$         | $\delta$           |                          |
|------------------------|------------------------------|--------------------|--------------------|--------------------|--------------------------|
|                        | MPa <sup>1/2</sup>           | MPa <sup>1/2</sup> | MPa <sup>1/2</sup> | MPa <sup>1/2</sup> |                          |
| Water (as Non-Solvent) | 15.5                         | 16                 | 42.3               | 47.8               |                          |
| Solvent                | Hansen Solubility Parameters |                    |                    |                    | Ra (MPa <sup>1/2</sup> ) |
|                        | $\delta_D$                   | $\delta_P$         | $\delta_H$         | $\delta$           |                          |
|                        | MPa <sup>1/2</sup>           | MPa <sup>1/2</sup> | MPa <sup>1/2</sup> | MPa <sup>1/2</sup> |                          |

**Table S7.** Comparison of the overall membranes performance of current membranes and a selection of lab-made and commercial membranes.

| Reference/<br>Membrane ID | Membrane Material |                              | Permeance<br>(L/m <sup>2</sup> h <sup>-1</sup> bar <sup>-1</sup> ) | Rejection<br>(%) |       |      |
|---------------------------|-------------------|------------------------------|--------------------------------------------------------------------|------------------|-------|------|
|                           | Support           | Top Layer/Brand-Name         |                                                                    | RB               | MgSO4 | NaCl |
| Hermans [9]               | PSf               | PA                           | 2.04 (H2O)                                                         | 100              | 96    | 93   |
| Hermans [10]              | XL PI             | PA                           | 2.65 (C2H5OH)                                                      | 100              |       |      |
| Marien[11]                | PSf               | PA                           | 1.23 (H2O)<br>0.38 (C2H5OH)                                        | 98               |       | 96   |
|                           | XL PI             | PA                           | 1.09 (H2O)<br>0.61 (C2H5OH)                                        | 99               |       | 97   |
| Dom [12]                  | XL PI             | poly( $\beta$ -alkanolamine) | 1.99 (C2H5OH)                                                      | 94               |       |      |
|                           | XL PI             | poly( $\beta$ -alkanolamine) | 1.57 (C2H5OH)                                                      | 100              |       |      |
|                           | XL PAN            | poly( $\beta$ -alkanolamine) | 0.46 (C2H5OH)                                                      | 99               |       |      |
|                           | XL PI             | poly(epoxyether)             | 2.18 (C2H5OH)                                                      | 97               |       |      |
|                           | XL PI             | poly(epoxyether)             | 1.66 (C2H5OH)                                                      | 99               |       |      |
|                           | XL PAN            | poly(epoxyether)             | 0.47 (C2H5OH)                                                      | 90               |       |      |

|                         |         |                 |                                              |      |       |
|-------------------------|---------|-----------------|----------------------------------------------|------|-------|
| Van Goethem [13]        | PSf     | PA with ZIF-8   | 2.70 (H <sub>2</sub> O)                      |      | 82    |
| Daem [14]               |         | PVDF-g-PSSA     | 2.40 (H <sub>2</sub> O)                      | 99   | 77    |
| Solomon [15]            | XL PI   | PA              | 1.53 (THF)                                   | 99   |       |
|                         |         |                 | 1.54 (DMF)                                   | 99   |       |
| Solomon [16]            | XL PI   | polyarylate     | 8.0 (CH <sub>3</sub> OH)                     | 99   |       |
|                         |         |                 | 3.8 (THF)                                    |      |       |
| Burgal [17]             |         | PEEK            | 0.22(THF)                                    |      |       |
| Karan [18]              | alumina | PA              | 52 (CH <sub>3</sub> OH)                      |      |       |
|                         | XL PI   | PA              | 19 (CH <sub>3</sub> OH)                      |      |       |
| Evonik [11,19–21]       | XL PI   | Duramem 150     | 0.15–0.35 (C <sub>2</sub> H <sub>5</sub> OH) |      |       |
|                         |         |                 | 0.09 (CH <sub>3</sub> OH)                    |      |       |
|                         |         |                 | 0.10 (THF)                                   |      |       |
|                         |         |                 | 0.16 (C <sub>2</sub> H <sub>5</sub> OH)      |      |       |
|                         |         | Duramem 200     | 0.28 (C <sub>2</sub> H <sub>5</sub> OH)      |      |       |
|                         |         |                 | 0.22–0.64                                    |      |       |
|                         |         |                 | 0.43 (C <sub>2</sub> H <sub>5</sub> OH)      |      |       |
|                         |         |                 | NF030306                                     |      |       |
|                         |         | Duramem 300     | 0.38 (C <sub>2</sub> H <sub>5</sub> OH)      |      |       |
|                         |         |                 | 1.20 (C <sub>2</sub> H <sub>5</sub> OH)      |      |       |
| Solsep [22,23]          |         | NF030306        | 0.38 (C <sub>2</sub> H <sub>5</sub> OH)      |      |       |
|                         |         | Solsep3360      | 1.20 (C <sub>2</sub> H <sub>5</sub> OH)      |      |       |
| Dow [24] [25]           |         | PA- NF90        | 6.67 (H <sub>2</sub> O)                      |      |       |
|                         |         |                 | 8.54 (H <sub>2</sub> O)                      | >97  | 85–95 |
|                         |         |                 | 10.38 (H <sub>2</sub> O)                     |      |       |
|                         |         | PA (PIP)- NF270 | 11.04 (H <sub>2</sub> O)                     | >96  | 82    |
| Hydranautics [24,26,27] | PA      | ESNA            | 4.90 (H <sub>2</sub> O)                      |      |       |
|                         |         |                 | 4.38 (H <sub>2</sub> O)                      |      | 70    |
| Yoon [26]               | PA      | LFC-1 (RO)      | 3.13 (H <sub>2</sub> O)                      |      |       |
| Koch [24,28]            |         | TFC-S           | 3.68 (H <sub>2</sub> O)                      |      |       |
|                         |         |                 | 11.00 (H <sub>2</sub> O)                     |      | 85    |
| Toray [28]              |         | UTC-20          |                                              |      |       |
|                         |         | TMG-10PA (PIP)  | 9.17 (H <sub>2</sub> O)                      |      | 99    |
| GE osmonics [29]        |         | desal-DK        | 4.43 (H <sub>2</sub> O)                      |      |       |
|                         |         |                 | 1.13 (C <sub>2</sub> H <sub>5</sub> OH)      | > 98 |       |
|                         |         | AD-90           | 0.51 (H <sub>2</sub> O)                      |      | >99   |
|                         |         | AG2540FM        | 2.79 (H <sub>2</sub> O)                      |      | >99   |
| Rasool [7]              | C15     | CA              | 12.8 (H <sub>2</sub> O)                      | 92.9 | 80.2  |
|                         | C17.5   | CA              | 5.7 (H <sub>2</sub> O)                       | 98.1 | 80.9  |
|                         | C20     | CA              | 2.4 (H <sub>2</sub> O)                       | 99.5 | 82.5  |
|                         | C10/10  | CA              | 3.5 (H <sub>2</sub> O)                       | 92.8 |       |
|                         | C10/30  | CA              | 1.3 (H <sub>2</sub> O)                       | 91.8 |       |
|                         | C10/10E | CA              | 3.5 (H <sub>2</sub> O)                       | 94.3 |       |
|                         | C10/30E | CA              | 1.3 (H <sub>2</sub> O)                       | 90.6 |       |

|                   |          |     |                         |      |      |
|-------------------|----------|-----|-------------------------|------|------|
| Current membranes | C20/10E  | CA  | 1.1 (H <sub>2</sub> O)  | 99.7 | 96.5 |
|                   | C20/30E  | CA  | 0.7 (H <sub>2</sub> O)  | 99.5 | 71.5 |
|                   | C20/50E  | CA  | 0.2 (H <sub>2</sub> O)  | 98.8 | 63.9 |
|                   | C20/10   | CA  | 1.0 (H <sub>2</sub> O)  | 99.8 | 92.9 |
|                   | C20/30   | CA  | 0.7 (H <sub>2</sub> O)  | 99.7 | 79.9 |
|                   | C20/50   | CA  | 0.2 (H <sub>2</sub> O)  | 98.9 | 81.3 |
|                   | CA15E    | CA  | 1.9 (H <sub>2</sub> O)  | 96.2 |      |
|                   | CTA10W   | CTA | 20.1 (H <sub>2</sub> O) | 94.0 |      |
|                   | CTA15W   | CTA | 16.8 (H <sub>2</sub> O) | 94.3 |      |
|                   | CTA17.5W | CTA | 12.2 (H <sub>2</sub> O) | 98.8 |      |
|                   | PES15E   | PES | 2.6 (H <sub>2</sub> O)  | 96.2 |      |
|                   | PES20E   | PES | 1.1 (H <sub>2</sub> O)  | 96.4 |      |
|                   | PSU15E   | PSU | 2.2 (H <sub>2</sub> O)  | 92.1 |      |
|                   | PSU20E   | PSU | 0.7(H <sub>2</sub> O)   | 98.5 |      |
|                   | PI15E    | PI  | 2.5(H <sub>2</sub> O)   | 98.7 |      |
|                   | PI20E    | PI  | 0.8 (H <sub>2</sub> O)  | 98.7 |      |

**Table S8.** Comparison of the overall membranes performance of current membranes and a selection of lab-made and commercial membranes using MgSO<sub>4</sub> feed solution.

| Manufacturer    | Type    | Polymer                  | MgSO <sub>4</sub> Rejection (%) | Permeance (L/m <sup>2</sup> h <sup>-1</sup> bar <sup>-1</sup> ) |
|-----------------|---------|--------------------------|---------------------------------|-----------------------------------------------------------------|
| Dow Filmtec™    | NF270   | Polyamide-TFC            | 99.2                            | 16.3                                                            |
|                 | NF90    | Polyamide-TFC            | 99.0                            | 9.5                                                             |
|                 | NF      | Polyamide-TFC            | 99.0                            | 6.1                                                             |
| GE Osmonics™    | Duracid | Polyamide-TFC            | 98.0                            | 1.6                                                             |
|                 | DL      | Polyamide-TFC            | 98.0                            | 3.1                                                             |
|                 | HL      | Polyamide-TFC            | 98.0                            | 9.7                                                             |
|                 | DK      | Polyamide-TFC            | 96.0                            | 5.4                                                             |
|                 | CK      | Cellulose Acetate        | 94.0                            | 3.4                                                             |
| Synder™         | NFX     | Polyamide-TFC            | 99.0                            | 4.9                                                             |
|                 | NFW     | Polyamide-TFC            | 97.0                            | 10.2                                                            |
|                 | NFG     | Polyamide-TFC            | 50.0                            | 13.6                                                            |
|                 | NDX     | Polyamide-TFC            | 90.0                            | 12.4                                                            |
|                 | TS80    | Polyamide-TFC            | 99.0                            | 4.5                                                             |
| TriSep™         | SB90    | Cellulose Acetate Blend  | 97.0                            | 3.3                                                             |
|                 | SBNF    | Cellulose Acetate        | 60.0                            | 2.1                                                             |
|                 | TS40    | Polypiperazine-amide-TFC | 90.0                            | 4.5                                                             |
|                 | XN45    | Polypiperazine-amide-TFC | 95.0                            | 7.9                                                             |
| Microdyn Nadir™ | NP010   | PES                      | 60.0                            | 5.0                                                             |
|                 | NP030   | PES                      | 60.0                            | 1.0                                                             |
| S. W. Lin et al |         | AV-NF-Pip 1              | 92.5                            | 9.0                                                             |

|                  |             |      |      |
|------------------|-------------|------|------|
| [5]              | AV-NF-Pip 2 | 96.1 | 12.0 |
|                  | AV-NF-Pip 3 | 97.4 | 9.4  |
|                  | AV-NF-Pip 4 | 96.4 | 10.3 |
|                  | AV-PVA-1    | 98.0 | 11.7 |
|                  | AV-PVA-2    | 97.8 | 9.4  |
|                  | AV-PVA-3    | 97.7 | 8.7  |
|                  | AV-PVA-4    | 96.5 | 8.5  |
|                  | AV-NF-TMC 1 | 97.3 | 9.4  |
|                  | AV-NF-TMC 2 | 98.2 | 12.0 |
|                  | AV-NF-TMC 3 | 97.6 | 13.0 |
| Rasool et al [7] | CA15        | 80.2 | 12.6 |
|                  | CA17.5      | 80.9 | 5.6  |
|                  | CA20        | 82.4 | 2.4  |
|                  | CA20/0      | 80.1 | 3.8  |
|                  | CA20/10     | 92.1 | 1.0  |
|                  | CA20/30     | 79.9 | 0.7  |
|                  | CA20/50     | 81.3 | 0.2  |
|                  | CA20/10E    | 96.5 | 1.1  |
|                  | CA20/30E    | 72.5 | 0.6  |
|                  | CA20/50E    | 70.9 | 0.2  |
|                  | CA20W       | 63.2 | 0.6  |
|                  | CTA10W      | 18.5 | 20.1 |
|                  | CTA15W      | 25.1 | 16.8 |
|                  | CTA17.5W    | 25.5 | 12.2 |
|                  | PES15E      | 49.2 | 2.6  |
|                  | PES20E      | 68.1 | 1.1  |
|                  | PSU15E      | 12.5 | 2.2  |
|                  | PSU15E      | 54.1 | 0.7  |
|                  | PI15E       | 14.5 | 2.6  |
|                  | PI20E       | 18.3 | 0.8  |

## Acknowledgments

Azam Rasool acknowledges and thanks to Aurora Teodorescu (Auras Dragalas from Brasov Romania) for fruitful discussion, helpful comments and visiting Leuven Belgium during this work. We acknowledge IWT-STW (Nanomexico AIO/150474/SBO), KU Leuven (C16/17/005), and the Belgian Federal Government through an I.A.P. - P.A.I. grant (IAP 7/05 FS2) for funding.

## References

1. Barton, A.F.M. CRC Handbook of Solubility Parameters and Other Cohesion Parameters; Apple Academic Press, 2017;.
2. Krevelen, D.W. and Hoftyzer, P.J. *Properties of polymers: correlations with chemical structure*. Elsevier Publishing Company: Amsterdam, Netherlands, 1972
3. Pearce, E.M. Properties of polymers, their estimation and correlation with chemical structure – (2nd rev. ed.), D. W. Van Krevelen, Elsevier, Amsterdam–Oxford–New York, 1976, 620 pp. *J. Polym. Sci. Part C: Polym. Lett.* **1977**, *15*, 56, doi:10.1002/pol.1977.130150109.
4. *Summary for Policymakers*; Cambridge University Press (CUP), 2012; pp. 1–30;.
5. Rasool, M.A.; Vankelecom, I.F. Use of  $\gamma$ -valerolactone and glycerol derivatives as bio-based renewable solvents for membrane preparation. *Green Chem.* **2019**, *21*, 1054–1064, doi:10.1039/c8gc03652g.
6. Rasool, M.A.; Van Goethem, C.; Vankelecom, I.F. Green preparation process using methyl lactate for cellulose-acetate-based nano-filtration membranes. *Sep. Purif. Technol.* **2020**, *232*, 115903, doi:10.1016/j.seppur.2019.115903.

7. Rasool, M.A.; Pescarmona, P.P.; Vankelecom, I.F.J. Applicability of Organic Carbonates as Green Solvents for Membrane Preparation. *ACS Sustain. Chem. Eng.* **2019**, *7*, 13774–13785, doi:10.1021/acssuschemeng.9b01507.
8. Hermans, S.; Mariën, H.; Dom, E.; Bernstein, R.; Vankelecom, I.F. Simplified synthesis route for interfacially polymerized polyamide membranes. *J. Membr. Sci.* **2014**, *451*, 148–156, doi:10.1016/j.memsci.2013.10.005.
9. S. Hermans, H. Mariën, C. Van Goethem, I.F.J. Vankelecom. Recent developments in thin film (nano) composite membranes for solvent resistant nanofiltration, *Curr. Opin. in Chem. Eng.* **2015**, *8*, 45–54.
10. Mariën, H.; Vankelecom, I.F. Transformation of cross-linked polyimide UF membranes into highly permeable SRNF membranes via solvent annealing. *J. Membr. Sci.* **2017**, *541*, 205–213, doi:10.1016/j.memsci.2017.06.080.
11. E. Dom, Epoxy-based membranes for solvent resistant nanofiltration, PhD Thesis KU Leuven, Leuven, Belgium, 2017.
12. Van Goethem, C.; Verbeke, R.; Hermans, S.; Bernstein, R.; Vankelecom, I.F.J. Controlled positioning of MOFs in interfacially polymerized thin-film nanocomposites. *J. Mater. Chem. A* **2016**, *4*, 16368–16376, doi:10.1039/c6ta05175h.
13. Daems, N.; Milis, S.; Verbeke, R.; Szymczyk, A.; Pescarmona, P.P.; Vankelecom, I.F.J. High-performance membranes with full pH-stability. *RSC Adv.* **2018**, *8*, 8813–8827, doi:10.1039/c7ra13663c.
14. Solomon, M.F.J.; Bhole, Y.; Livingston, A. High flux hydrophobic membranes for organic solvent nanofiltration (OSN) – Interfacial polymerization, surface modification and solvent activation. *J. Membr. Sci.* **2013**, *434*, 193–203, doi:10.1016/j.memsci.2013.01.055.
15. Jimenez-Solomon, M.F.; Song, Q.; Jelfs, K.E.; Munoz-Ibanez, M.; Livingston, A. Polymer nanofilms with enhanced microporosity by interfacial polymerization. *Nat. Mater.* **2016**, *15*, 760–767, doi:10.1038/nmat4638.
16. Burgal, J.D.S.; Peeva, L.; Livingston, A. Towards improved membrane production: using low-toxicity solvents for the preparation of PEEK nanofiltration membranes. *Green Chem.* **2015**, *18*, 2374–2384, doi:10.1039/c5gc02546j.
17. Karan, S.; Jiang, Z.; Livingston, A.G. Sub-10 nm polyamide nanofilms with ultrafast solvent transport for molecular separation. *Sci.* **2015**, *348*, 1347–1351, doi:10.1126/science.aaa5058.
18. Darvishmanesh, S.; Firoozpour, L.; Vanneste, J.; Luis, P.; Degreè, J.; Van Der Bruggen, B. Performance of solvent resistant nanofiltration membranes for purification of residual solvent in the pharmaceutical industry: experiments and simulation. *Green Chem.* **2011**, *13*, 3476–3483, doi:10.1039/c1gc15462a.
19. Solomon, M.F.J.; Bhole, Y.; Livingston, A. High flux membranes for organic solvent nanofiltration (OSN) – Interfacial polymerization with solvent activation. *J. Membr. Sci.* **2012**, *423–424*, 371–382, doi:10.1016/j.memsci.2012.08.030.
20. Großeheilmann, J.; Büttner, H.; Kohrt, C.; Kragl, U.; Werner, T. Recycling of Phosphorus-Based Organocatalysts by Organic Solvent Nanofiltration. *ACS Sustain. Chem. Eng.* **2015**, *3*, 2817–2822, doi:10.1021/acssuschemeng.5b00734.
21. Darvishmanesh, S.; Robberecht, T.; Luis, P.; Degreè, J.; Van Der Bruggen, B. Performance of Nanofiltration Membranes for Solvent Purification in the Oil Industry. *J. Am. Oil Chem. Soc.* **2011**, *88*, 1255–1261, doi:10.1007/s11746-011-1779-y.
22. Van Der Bruggen, B.; Jansen, J.C.; Figoli, A.; Geens, J.; Boussu, K.; Drioli, E. Characteristics and Performance of a “Universal” Membrane Suitable for Gas Separation, Pervaporation, and Nanofiltration Applications. *J. Phys. Chem. B* **2006**, *110*, 13799–13803, doi:10.1021/jp0608933.
23. Lu, † Y.; Suzuki, ‡ T.; Zhang, † W.; Moore, J.S.; Mariñas, ‡ B.J. Nanofiltration Membranes Based on Rigid Star Amphiphiles. *Chem. Mater.* **2007**, *19*, 3194–3204, doi:10.1021/cm070200a.
24. Suzuki, † T.; Lu, ‡ Y.; Zhang, † W.; Moore, ‡ J.S.; Mariñas, † B.J. Performance Characterization of Nanofiltration Membranes Based on Rigid Star Amphiphiles. *Environ. Sci. Technol.* **2007**, *41*, 6246–6252, doi:10.1021/es070157s.
25. Yoon, J.; Amy, G.; Chung, J.; Sohn, J.; Yoon, Y. Removal of toxic ions (chromate, arsenate, and perchlorate) using reverse osmosis, nanofiltration, and ultrafiltration membranes. *Chemosphere* **2009**, *77*, 228–235, doi:10.1016/j.chemosphere.2009.07.028.
26. Boussu, K.; Van der Bruggen, B.; Volodin, A.; Van Haesendonck, C.; Delcour, J.; Van der Meeren, P.; Vandecasteele, C. Characterization of commercial nanofiltration membranes and comparison with self-made polyethersulfone membranes. *Desalination* **2006**, *191*, 245–253, doi:10.1016/j.desal.2005.07.025.
27. Xu, P.; Drewes, J.E. Viability of nanofiltration and ultra-low pressure reverse osmosis membranes for multi-beneficial use of methane produced water. *Sep. Purif. Technol.* **2006**, *52*, 67–76, doi:10.1016/j.seppur.2006.03.019.
28. Marchetti, P.; Solomon, M.F.J.; Szekely, G.; Livingston, A. Molecular Separation with Organic Solvent Nanofiltration: A Critical Review. *Chem. Rev.* **2014**, *114*, 10735–10806, doi:10.1021/cr500006j.
29. Lin, S.W.; Martínez-Ayala, A.V.; Pérez-Sicairos, S.; Félix-Navarro, R.M. Preparation and characterization of low-pressure and high MgSO<sub>4</sub> rejection thin-film composite NF membranes via interfacial polymerization process. *Polym. Bull.* **2019**, *76*, 5619–5632, doi:10.1007/s00289-018-2665-7.
